# Supplementary figures and images for: Development of a novel voltammetric sensor for the determination of methamphetamine in biological samples on the pretreated pencil graphite electrode
Source: Royal Society of Chemistry journal article supplement (doi:10.1039/c4ra11399c), 2014-12-22

### Supplementary Information:

The related DPVs of Figure 2 are shown in Figure 2S.

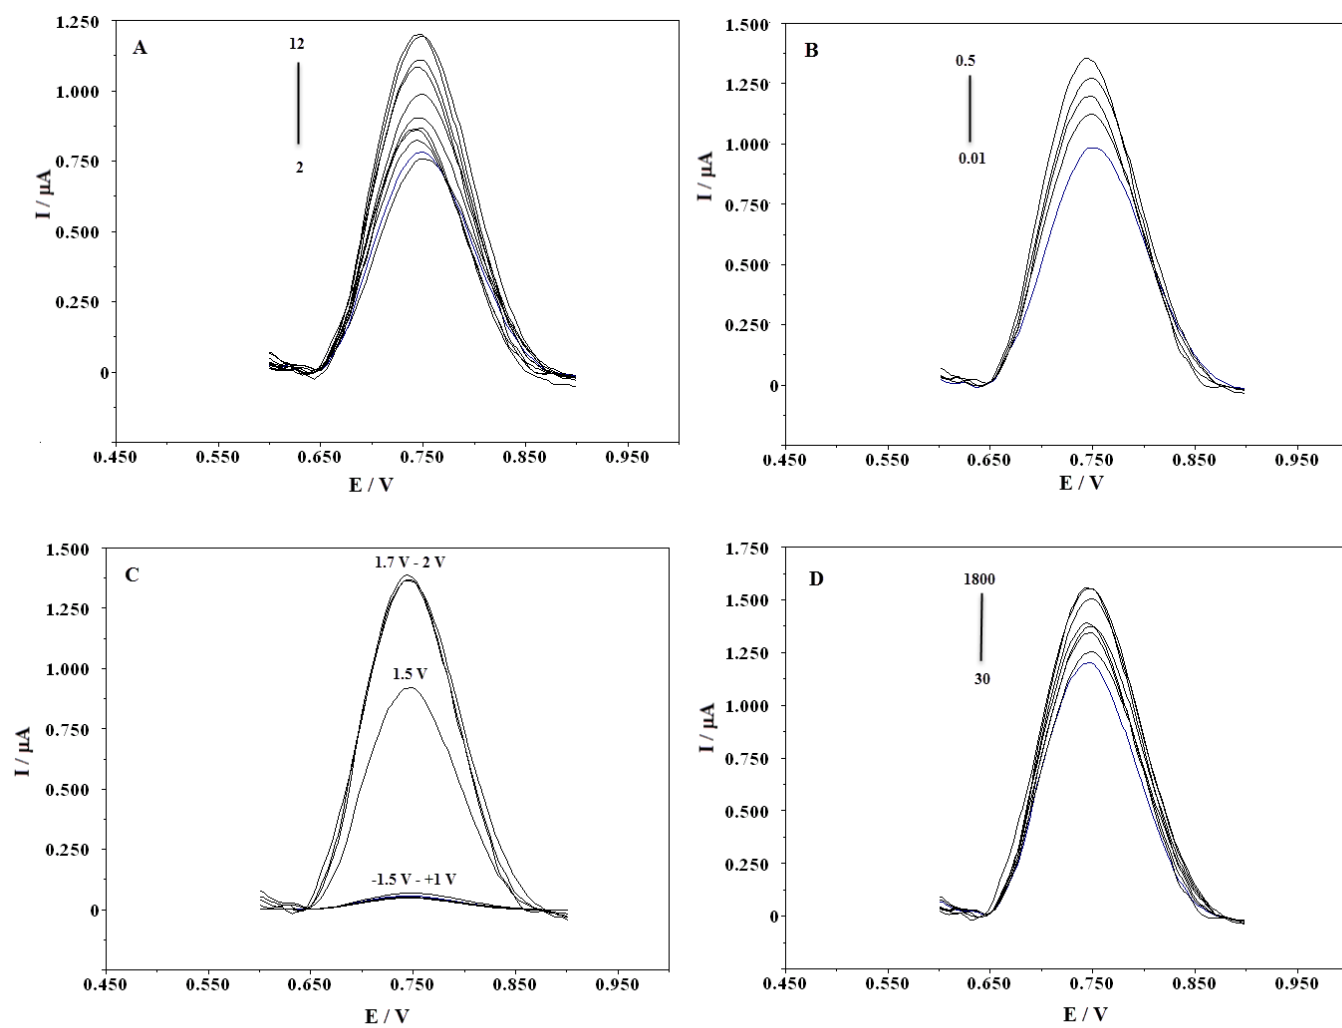

Figure 2S

Supplement: c4ra11399c1.pdf [file c4ra11399c1.pdf]
